# Supplementary material for: The dual burden of animal and human zoonoses: A systematic review
Source: PubMed Central journal article supplement (PMC9605338; doi:10.1371/journal.pntd.0010540), 2022-10-14

# PLOS Neglected Tropical Diseases

## The dual burden of animal and human zoonoses: a systematic review

--Manuscript Draft--

|                                                                                                                                                                                                                                                                                                                                                                                                                                                                                               |                                                                                                                                                                                                                                                                                                                                                                                                                                                                                                                                                                                                                                                                                                                                                                                                                                                                                                                                                                                                                                                                                                                                                                                                                             |
|-----------------------------------------------------------------------------------------------------------------------------------------------------------------------------------------------------------------------------------------------------------------------------------------------------------------------------------------------------------------------------------------------------------------------------------------------------------------------------------------------|-----------------------------------------------------------------------------------------------------------------------------------------------------------------------------------------------------------------------------------------------------------------------------------------------------------------------------------------------------------------------------------------------------------------------------------------------------------------------------------------------------------------------------------------------------------------------------------------------------------------------------------------------------------------------------------------------------------------------------------------------------------------------------------------------------------------------------------------------------------------------------------------------------------------------------------------------------------------------------------------------------------------------------------------------------------------------------------------------------------------------------------------------------------------------------------------------------------------------------|
| <b>Manuscript Number:</b>                                                                                                                                                                                                                                                                                                                                                                                                                                                                     | PNTD-D-22-00699                                                                                                                                                                                                                                                                                                                                                                                                                                                                                                                                                                                                                                                                                                                                                                                                                                                                                                                                                                                                                                                                                                                                                                                                             |
| <b>Full Title:</b>                                                                                                                                                                                                                                                                                                                                                                                                                                                                            | The dual burden of animal and human zoonoses: a systematic review                                                                                                                                                                                                                                                                                                                                                                                                                                                                                                                                                                                                                                                                                                                                                                                                                                                                                                                                                                                                                                                                                                                                                           |
| <b>Short Title:</b>                                                                                                                                                                                                                                                                                                                                                                                                                                                                           | The dual burden of animal and human zoonoses                                                                                                                                                                                                                                                                                                                                                                                                                                                                                                                                                                                                                                                                                                                                                                                                                                                                                                                                                                                                                                                                                                                                                                                |
| <b>Article Type:</b>                                                                                                                                                                                                                                                                                                                                                                                                                                                                          | Research Article                                                                                                                                                                                                                                                                                                                                                                                                                                                                                                                                                                                                                                                                                                                                                                                                                                                                                                                                                                                                                                                                                                                                                                                                            |
| <b>Keywords:</b>                                                                                                                                                                                                                                                                                                                                                                                                                                                                              | zoonosis; dual burden; DALY; zDALY; review                                                                                                                                                                                                                                                                                                                                                                                                                                                                                                                                                                                                                                                                                                                                                                                                                                                                                                                                                                                                                                                                                                                                                                                  |
| <b>Abstract:</b>                                                                                                                                                                                                                                                                                                                                                                                                                                                                              | <p>Background</p> <p>Zoonoses can cause a substantial burden on both human and animal health. Globally, estimates of the dual (human and animal) burden of zoonoses are scarce. Therefore, this study aims to quantify the dual burden of zoonoses using a comparable metric, “zoonosis Disability Adjusted Life Years” (zDALY).</p> <p>Methodology/Principal Findings</p> <p>We systematically reviewed studies that quantify in the same article zoonoses in animals, through monetary losses, and in humans in terms of Disability Adjusted Life Years (DALYs). We searched EMBASE, Web of Science, Scopus, PubMed, and Google Scholar. We excluded articles that did not provide the data to estimate the zDALY or those for which full text was not available. This study was registered at PROSPERO, CRD42022313081.</p> <p>Conclusions/Significance</p> <p>We identified 512 potentially eligible records. After deduplication and screening of the title and abstract, 23 records were assessed for full-text review. Fourteen studies were included in this systematic review. The data contains estimates from 10 countries, a study at continental level (Asia and Africa), and 2 studies on a global scale.</p> |
| <b>Additional Information:</b>                                                                                                                                                                                                                                                                                                                                                                                                                                                                |                                                                                                                                                                                                                                                                                                                                                                                                                                                                                                                                                                                                                                                                                                                                                                                                                                                                                                                                                                                                                                                                                                                                                                                                                             |
| <b>Question</b>                                                                                                                                                                                                                                                                                                                                                                                                                                                                               | <b>Response</b>                                                                                                                                                                                                                                                                                                                                                                                                                                                                                                                                                                                                                                                                                                                                                                                                                                                                                                                                                                                                                                                                                                                                                                                                             |
| <b>Financial Disclosure</b><br><br>Enter a financial disclosure statement that describes the sources of funding for the work included in this submission. Review the <a href="#">submission guidelines</a> for detailed requirements. View published research articles from <a href="#">PLOS NTDs</a> for specific examples.<br><br>This statement is required for submission and <b>will appear in the published article</b> if the submission is accepted. Please make sure it is accurate. | <p>The study was partially funded by “BECAL” (LPN) and the Section of Epidemiology, Vetsuisse faculty (UZH) (PT).</p> <p>BECAL had no role in study design, data collection and analysis, decision to publish, or preparation of the manuscript.</p>                                                                                                                                                                                                                                                                                                                                                                                                                                                                                                                                                                                                                                                                                                                                                                                                                                                                                                                                                                        |

### Unfunded studies

Enter: *The author(s) received no specific funding for this work.*

### Funded studies

Enter a statement with the following details:

- Initials of the authors who received each award
- Grant numbers awarded to each author
- The full name of each funder
- URL of each funder website
- Did the sponsors or funders play any role in the study design, data collection and analysis, decision to publish, or preparation of the manuscript?
- **NO** - Include this sentence at the end of your statement: *The funders had no role in study design, data collection and analysis, decision to publish, or preparation of the manuscript.*
- **YES** - Specify the role(s) played.

\* typeset

### Competing Interests

Use the instructions below to enter a competing interest statement for this submission. On behalf of all authors, disclose any [competing interests](#) that could be perceived to bias this work—acknowledging all financial support and any other relevant financial or non-financial competing interests.

This statement **will appear in the published article** if the submission is accepted. Please make sure it is accurate. View published research articles from [PLOS NTDs](#) for specific examples.

The authors have declared that no competing interests exist

**NO authors have competing interests**

Enter: *The authors have declared that no competing interests exist.*

**Authors with competing interests**

Enter competing interest details beginning with this statement:

*I have read the journal's policy and the authors of this manuscript have the following competing interests: [insert competing interests here]*

\* typeset

This statement is **required** for submission and **will appear in the published article** if the submission is accepted. Please make sure it is accurate and that any funding sources listed in your Funding Information later in the submission form are also declared in your Financial Disclosure statement.

**Data Availability**

Authors are required to make all data underlying the findings described fully available, without restriction, and from the time of publication. PLOS allows rare exceptions to address legal and ethical concerns. See the [PLOS Data Policy](#) and [FAQ](#) for detailed information.

Yes - all data are fully available without restriction

A Data Availability Statement describing where the data can be found is required at submission. Your answers to this question constitute the Data Availability Statement and **will be published in the article**, if accepted.

**Important:** Stating 'data available on request from the author' is not sufficient. If your data are only available upon request, select 'No' for the first question and explain your exceptional situation in the text box.

Do the authors confirm that all data underlying the findings described in their manuscript are fully available without restriction?

**Describe where the data may be found in full sentences. If you are copying our sample text, replace any instances of XXX with the appropriate details.**

All relevant data are within the manuscript and its Supporting Information files. Scripts are available at <https://github.com/LizPNZ/Dual-burden-of-zoonosis>

- If the data are **held or will be held in a public repository**, include URLs, accession numbers or DOIs. If this information will only be available after acceptance, indicate this by ticking the box below. For example: *All XXX files are available from the XXX database (accession number(s) XXX, XXX).*
- If the data are all contained **within the manuscript and/or Supporting Information files**, enter the following: *All relevant data are within the manuscript and its Supporting Information files.*
- If neither of these applies but you are able to provide **details of access elsewhere**, with or without limitations, please do so. For example:

*Data cannot be shared publicly because*

of [XXX]. Data are available from the XXX Institutional Data Access / Ethics Committee (contact via XXX) for researchers who meet the criteria for access to confidential data.

The data underlying the results presented in the study are available from (include the name of the third party and contact information or URL).

- This text is appropriate if the data are owned by a third party and authors do not have permission to share the data.

\* typeset

Additional data availability information:

# 1 The dual burden of animal and human zoonoses: a systematic review

2 Liz P. Noguera,<sup>1,2¶</sup> Duriya Charypkhan<sup>1,2¶</sup>, Sonja Hartnack<sup>1</sup>, Paul R. Torgerson<sup>1</sup>, Simon R. Rüegg<sup>1</sup>

3 <sup>1</sup> Section of Epidemiology, Vetsuisse Faculty, University of Zürich, Zürich, Switzerland

4 <sup>2</sup> Epidemiology and Biostatistics, Life Science Zurich Graduate School, University of Zurich, Zurich,  
5 Switzerland

6 [lizpaola.noguerazayas@uzh.ch](mailto:lizpaola.noguerazayas@uzh.ch), [lpnogal@gmail.com](mailto:lpnogal@gmail.com)

7 [duriya.charypkhan@uzh.ch](mailto:duriya.charypkhan@uzh.ch), [charypkhan1@gmail.com](mailto:charypkhan1@gmail.com)

## 8 **Abstract**

### 9 Background

10 Zoonoses can cause a substantial burden on both human and animal health. Globally, estimates  
11 of the dual (human and animal) burden of zoonoses are scarce. Therefore, this study aims to  
12 quantify the dual burden of zoonoses using a comparable metric, “zoonosis Disability Adjusted Life  
13 Years” (zDALY).

### 14 Methodology/Principal Findings

Comment: you are talking about methods in this paragraph, or findings?  
your text tells it's about methods and your subtitle says about both. please  
clarify it. It's better to separate these two parts. On the other hand you wrote  
your finding in conclusion part.

15 We systematically reviewed studies that quantify in the same article zoonoses in animals, through  
16 monetary losses, and in humans in terms of Disability Adjusted Life Years (DALYs). We searched  
17 EMBASE, Web of Science, Scopus, PubMed, and Google Scholar. We excluded articles that did not  
18 provide the data to estimate the zDALY or those for which full text was not available. This study  
19 was registered at PROSPERO, CRD42022313081.

## 20 Conclusions/Significance

21 We identified 512 potentially eligible records. After deduplication and screening of the title and  
22 abstract, 23 records were assessed for full-text review. Fourteen studies were included in this  
23 systematic review. The data contains estimates from 10 countries, a study at continental level  
24 (Asia and Africa), and 2 studies on a global scale.

25 The total burden from these 14 studies in zDALYs is 11,015,438 (CI 95%: 6,235,971-15,806,100),  
26 most of which is attributable to rabies and echinococcosis worldwide, including the Animal Loss  
27 Equivalent (ALE) is 4,936,233 (CI 95%: 3,512,616-6,357,435). These results are based on ten  
28 zoonotic diseases (rabies, echinococcosis, cysticercosis, brucellosis, leptospirosis, anthrax, Q-  
29 fever, CCHF, tularemia, and toxoplasmosis) which had the biggest impact on the public health  
30 sector.

## 31 **Author Summary**

32 Zoonoses impact humans and animals in several ways. Unfortunately, the burden of zoonoses is  
33 usually not characterized and quantified through integrated human and animal metrics. Our study  
34 is the first systematic review to assess the dual burden of zoonotic diseases in humans and animals  
35 globally. In the considered set of human and animal burden of zoonoses, 45% of the zDALY was  
36 due to animal disease. Therefore, metrics encompassing both burdens are likely to change  
37 decision-making regarding the prevention and control of zoonoses. Implementing a One Health  
38 approach will require the application of such metrics. We believe that quantification of the dual  
39 burden of the diseases is a key to improving zoonosis prioritization decision-making, and resource

40 allocation. This study outlines the need for integrated studies on zoonoses and reporting of data  
41 with a comparable metric.

## 42 **Introduction**

43 Zoonoses are diseases that can be transmitted directly or indirectly from animals to humans (and  
44 vice versa, hence anthroponoses). Around 6 in 10 human infections are zoonotic [1]. In the human  
45 population, early detection of zoonoses prevents loss of life, well-being, money, time, and  
46 productivity. By definition, zoonoses harm domestic animals and may threaten wildlife [2].  
47 Zoonotic diseases also incur financial costs, including those caused by losses to humans, animals,  
48 and the environment. Integrated surveillance in animals can provide significant benefits, including  
49 knowledge generation. The additional economic benefit of zoonoses surveillance might help  
50 decide how much data integration is sought, impacting surveillance types, diseases, and  
51 geographical settings. Recent pandemics have highlighted the need for surveillance systems for  
52 zoonotic events, and the need for better communication across the human-animal-ecosystems  
53 continuum.[3] Because human, animal, and ecosystem health are intimately related, surveillance  
54 should be organized in an integrated way [4]. This allows for a comprehensive risk assessment and  
55 the design of appropriate responses [5].

56 The business case for a One Health (OH) approach to mitigation of zoonoses has been presented  
57 as a framework [6] which includes the creation of one health surveillance and response programs  
58 for future emerging diseases. Animal health surveillance data can be used to inform public health  
59 messaging, control measures along the food chain, and establish public health surveillance if a  
60 pathogen is present in the human population and public health action is required.



61 In general, the impact of zoonotic diseases on the human population is measured by financial cost,  
62 mortality, morbidity, or other indicators known as disease burden [7]. The specific burden of a  
63 disease on humans can be quantified using the Disability Adjusted Life Years (DALY).[8] Methods  
64 that estimate the human disease burden in monetary terms include costs associated with the  
65 diagnostics and treatment of the disease, the statistical value of a human life, costs related to the  
66 loss of productivity or loss of income in humans.

67 The direct impact of animal disease is studied using various economic models. For example, the  
68 burden of diseases can be quantified through the money spent on the disease intervention  
69 programs, or money accounted for the loss of animal productivity (less milk/meat yield, etc.). The  
70 challenge of economic analysis in a OH context is that the boundaries of the system for which costs  
71 and benefits incur can be extended or restricted arbitrarily and hence alternative economic  
72 models are needed.

73 A pragmatic approach to consider the combined burden on human and animal health has been  
74 proposed as “*zoonosis Disability Adjusted Life Years*” (zDALYs) [9]. The zDALYs extends the DALY  
75 framework to domestic animals. The idea behind this indicator is that the animal burden estimated  
76 as monetary losses can be converted to Animal Loss Equivalent (ALE). The ALE is basically a metric  
77 that reflects the time trade-off for human life years to “replace” the animal loss, e.g., it is the  
78 amount of time that a farmer would need to spend to recover the losses.

79 Despite the availability of data on the zoonosis burden in humans and animals regarding monetary  
80 and societal costs separately, only a few studies have estimated the dual burden in animals and

81 humans [10–12]. We conducted a systematic review of the literature focusing on socio-economic  
82 burden of zoonoses worldwide and estimated the zDALYs of such studies.

## 83 **Methods**

### 84 **Search strategy and selection criteria**

You should refer to supplementary

85 We followed the guidelines for “Preferred Reporting Items for Systematic reviews and Meta-  
86 Analyses (PRISMA) [13]. A medical librarian assisted in the development of the search syntax.

87 We searched electronic academic databases (Embase, Ovid Medline, Scopus, Web of Science) and  
88 internet search engines (Google Scholar) for observational epidemiological studies on, at least, a  
89 zoonotic disease that includes human disease burden in DALYs and animal disease burden  
90 expressed in monetary terms. We included all peer-reviewed studies from an unrestricted period  
91 until November 2021. We excluded non-observational epidemiological studies such as  
92 experimental studies (e.g., only molecular biology studies), clinical cases, scientific  
93 correspondence, or mathematical models without data on the burden of zoonoses.

94 The data sources and search terms with results are provided in the supporting information (pp 1-  
95 2).

### 96 **Data extraction**

97 According to the eligibility criteria stated above, the identified titles and abstracts were  
98 independently reviewed by two reviewers (LPN and DC). Then, DC and LPN independently  
99 assessed the full texts of the included papers and documented the reasons for exclusions. The  
100 eligibility disagreements were resolved by group discussion.

101 The data were independently extracted, and double entered into a Microsoft Excel spreadsheet  
102 by the two reviewers. For each study, the size of human and animal populations, diseases, DALYs,  
103 and associated animal losses were extracted.

#### 104 **Data analysis**

105 We estimated the Animal Loss Equivalents (ALE) of each finding to calculate the zoonosis Disability  
106 Adjusted Life Years (zDALY). We divided the annual monetary value of animal health losses by the  
107 Gross National Income (GNI) per capita in US\$ at the period of the study. The GNIs were obtained  
108 from World Bank Open Data. For the economic losses that were in a different currency than the  
109 US\$, we converted it into the US\$ at the year of the study using a historical currency converter  
110 [14].

111 ALE = annual monetary value of animal health losses/ GNI per capita in US\$ at the period  
112 of the study

113 We computed the zDALY, adding the DALY of the findings to the ALE that we estimated.

$$114 \quad \quad \quad \text{zDALY} = \text{DALY} + \text{ALE}$$

115 To account for the uncertainty of all estimates, we generated random numbers between the lower  
116 and upper bounds of the distributions from the previous studies. We set 100,000 iterations for  
117 each estimation. According to the original studies, we reported the 50, 2.5, and 97.5 percentiles  
118 of the estimates, and 50, 5, 95 percentiles. We have also kept the terms that previous studies used  
119 to express uncertainty.

120 We performed the analyses in R 4.1.3. Scripts are available at <https://github.com/LizPNZ/Dual->  
121 [burden-of-zoonosis](https://github.com/LizPNZ/Dual-burden-of-zoonosis)

122 The stochastic approaches used to calculate zDALYs imply that sensitivity is included in the  
123 calculations.

124 We estimated ALEs and zDALYs for all countries with available data over the study period. We  
125 reported bias qualitatively through the ROBIS tool.[15] The ROBIS tool encompasses three phases,  
126 the first being optional, as it assesses the relevance of the review and the target question. We  
127 considered Phase 1 redundant because its questions are a repetition of the inclusion criteria  
128 already described in the protocol and methodology. Phase 2 includes the identification of concerns  
129 with the review process, and Phase 3, the judgment of risk of bias.

130 This study is registered at **PROSPERO, CRD42022313081**.

131 **Results**

why result doesn't referred to flow diagram?

132 We identified 552 articles through electronic database searches (Figure 1). After removing 140  
133 duplicates, 412 articles were screened for titles and abstracts. The full texts of 23 articles were  
134 reviewed and 9 were excluded at this stage. Thus, 14 articles are included in this review (Table 1,  
135 supporting information, p 5). Common reasons for exclusion at the full-text screening stage were  
136 no relevant data or the absence of data on animal monetary losses, DALYs in humans, or absence  
137 of full-text. The list of articles excluded at the full-text stage with the brief reasons for exclusion  
138 can be found in supporting information p 3.

139

140 Table 1: Findings in the dual burden of zoonoses (ordered by ascending year of the data source

| Authors           | Period of data source                               | Zoonotic disease/pathogen | Country/Region  | DALY                                                                                                                                                                                                                | Uncertainty | Animal species | Animal loss                                                                                                                                                          |
|-------------------|-----------------------------------------------------|---------------------------|-----------------|---------------------------------------------------------------------------------------------------------------------------------------------------------------------------------------------------------------------|-------------|----------------|----------------------------------------------------------------------------------------------------------------------------------------------------------------------|
| Knobel et al.[16] | Human data: 1996-2000, 2003<br>Livestock cost: 2002 | Rabies                    | Africa and Asia | <p><b>Africa:</b> 747,918 (217,954-1,449,114)</p> <p><b>Asia:</b> 1,039,119 (302,324-1,983,646)</p> <p><b>Total without PEP:</b> 9,504,237 (4,848,684-15,264,050)</p> <p><b>Total:</b> 1787886 (799615-2984109)</p> | 90 % CI     | Livestock      | <p><b>Africa:</b> US\$ 1.7 (1.5–1.9)</p> <p><b>Asia:</b> US\$ 10.5 (9.4–11.8)</p> <p><b>Total:</b> US\$ 12.3 (11–13.7)</p> <p>(All values in million dollars)</p>    |
| Budke et al.[17]  | 1996-2003                                           | Cystic echinococcosis     | Worldwide       | <p><b>Unadjusted:</b> 285,407 (218,515–366,133)</p> <p><b>Adjusted for underreporting:</b> 1,009,662 (862,119–1,175,654)</p>                                                                                        | 95 % CI     | Livestock      | <p><b>Unadjusted:</b> US\$ 1,249,866,660 (942,356,157–1,622,045,957)</p> <p><b>Adjusted for underreporting:</b> US\$ 2,190,132,464 (1,572,373,055–2,951,409,989)</p> |

|                     |                                                        |                                           |                                  |                         |                                         |                                   |                                                                                                                                                                                                                                                              |
|---------------------|--------------------------------------------------------|-------------------------------------------|----------------------------------|-------------------------|-----------------------------------------|-----------------------------------|--------------------------------------------------------------------------------------------------------------------------------------------------------------------------------------------------------------------------------------------------------------|
| Budke et al.[18]    | Human data:<br>2001-2003<br>Animal data:<br>1980, 1997 | Echinococcosis                            | China (Shiqu County)             | 1100                    | 95 % CI<br>(For animal loss estimation) | Livestock<br>(calves, yaks, meat) | <b>Total losses</b> (excluding losses in calf production, carcass weight, and yak hide):<br>US\$ 278,292 (240,829–318,249)<br><br><b>Total losses</b> (including losses in calf production, carcass weight, and yak hide):<br>US\$ 439,734 (384,342–498,447) |
| Trevisan et al.[19] | 2007                                                   | Cysticercosis<br>( <i>Taenia solium</i> ) | Mozambique<br>(Angónia district) | 2003<br>(1433–2762)     | 95 % UI                                 | Pigs                              | US\$ 22,282 (12,315–35,647)                                                                                                                                                                                                                                  |
| Praet et al.[20]    | 2008                                                   | Cysticercosis<br>( <i>Taenia solium</i> ) | Cameroon                         | 45,838 (14,108–103,469) | 95 % CR                                 | Pigs                              | € 478,844 (369,587–601,325)                                                                                                                                                                                                                                  |
| Moro et al.[20]     | 2010                                                   | Cystic echinococcosis                     | Peru                             | 1,139 (861–1,489)       | 95 % CI                                 | Livestock                         | US\$ 3846754 (2,676,181–4,911,383)                                                                                                                                                                                                                           |

|                    |      |        |              |                                  |         |           |                            |
|--------------------|------|--------|--------------|----------------------------------|---------|-----------|----------------------------|
| Hampson et al.[21] | 2010 | Rabies | Worldwide    | 3,714,333 (1,316,000–10,519,000) | 95 % CI | Livestock | <b>Total: 129.55</b>       |
|                    |      |        | Asia 2       | 357,015 (80,000–655,000)         |         |           | <b>Asia 2: 2.073</b>       |
|                    |      |        | Asia 3       | 160,801 (75,000–853,000)         |         |           | <b>Asia 3: 0.564</b>       |
|                    |      |        | Asia 4       | 16,521 (10,000–83,000)           |         |           | <b>Asia 4: 11.248</b>      |
|                    |      |        | China        | 374,851 (60,000–674,000)         |         |           | <b>China: 4.235</b>        |
|                    |      |        | India        | 1,301,865 (377,000–3,436,000)    |         |           | <b>India: 9.050</b>        |
|                    |      |        | Indonesia    | 12,311 (12,000–198,000)          |         |           | <b>Indonesia: 6.384</b>    |
|                    |      |        | North Africa | 123,074 (38,000–467,000)         |         |           | <b>North Africa: 2.756</b> |



|  |  |  |                 |                                 |  |                                |
|--|--|--|-----------------|---------------------------------|--|--------------------------------|
|  |  |  | Congo Basin     | 449,382 (244,000–<br>1,031,000) |  | <b>Congo Basin: 0.481</b>      |
|  |  |  | West Africa     | 375,023 (206,000–971,000)       |  | <b>West Africa: 6.684</b>      |
|  |  |  | SADC            | 398,164 (157,000–<br>1,713,000) |  | <b>SADC: 4.600</b>             |
|  |  |  | Andean          | 1,582 (0–4000)                  |  | <b>Andean: 10.753</b>          |
|  |  |  | Brazil          | 1,023 (0–2000)                  |  | <b>Brazil: 16.620</b>          |
|  |  |  | Caribbean       | 8,581 (4000–17,000)             |  | <b>Caribbean: 2.575</b>        |
|  |  |  | Central America | 495 (0–3000)                    |  | <b>Central America: 31.308</b> |
|  |  |  | Southern Cone   | 270 (0–1000)                    |  | <b>Southern Cone: 4.710</b>    |

|                          |           |                                           |                |                                                             |         |                              |                                                                                                                             |
|--------------------------|-----------|-------------------------------------------|----------------|-------------------------------------------------------------|---------|------------------------------|-----------------------------------------------------------------------------------------------------------------------------|
|                          |           |                                           | Eastern Europe | 1,948 (0–5000)                                              |         |                              | <b>Eastern Europe: 10.460</b>                                                                                               |
|                          |           |                                           | Eurasia        | 117,116 (46,000–368,000)                                    |         |                              | <b>Eurasia: 4.451</b>                                                                                                       |
|                          |           |                                           | Middle East    | 14,310 (6000–39,000)                                        |         |                              | <b>Middle East: 0.592</b><br>(In thousands of US\$)                                                                         |
| van Asseldonk et al.[22] | 2007-2011 | Q fever                                   | Netherlands    | 2462                                                        | ---     | Goats                        | <b>Loss culling milk goat: € 300 /case</b><br><b>Loss breeding prohibition: € 250/ goat</b><br><b>Total: € 0.03 Million</b> |
| Trevisan et al.[23]      | 2012      | Cysticercosis<br>( <i>Taenia solium</i> ) | Tanzania       | 31,863 (9136–72,078)                                        | 95 % UI | Pigs                         | US\$ 2,800,000 (1,100,000–5,400,000)                                                                                        |
| Shwiff et al.[24]        | 2005-2014 | Rabies                                    | Viet Nam       | 12,339                                                      | ---     | Livestock                    | US\$ 10,344,223                                                                                                             |
| Sultanov et al.[25]      | 2003-2015 | Rabies                                    | Kazakhstan     | <b>Total: 454 (339–593) Without PEP: 7827 (4746–12,074)</b> | 95 % CI | Livestock<br>(cattle, sheep, | US\$ 5,400,000 (4,000,000 – 7,100,000)                                                                                      |

|                       |           |                                                                                  |             |                                                                                                                                                                                                                                       |        |                                       |                                                                                                                                                                                                             |
|-----------------------|-----------|----------------------------------------------------------------------------------|-------------|---------------------------------------------------------------------------------------------------------------------------------------------------------------------------------------------------------------------------------------|--------|---------------------------------------|-------------------------------------------------------------------------------------------------------------------------------------------------------------------------------------------------------------|
|                       |           |                                                                                  |             |                                                                                                                                                                                                                                       |        | horses and camels)                    |                                                                                                                                                                                                             |
| Charypkhan et al.[26] | 2006-2015 | Brucellosis                                                                      | Kazakhstan  | 713                                                                                                                                                                                                                                   | ----   | Cattle, sheep                         | US\$ 21,316,800                                                                                                                                                                                             |
| Sanhueza et al.[27]   | 2013-2019 | Leptospirosis                                                                    | New Zealand | <p><b>At risk of leptospirosis:</b><br/>14.07 (1.86–80.73)</p> <p><b>Not at risk of leptospirosis:</b><br/>3.69 (0.49–21.20)</p> <p><b>Total: 17.76 (2.35–101.93)</b></p>                                                             | 95% PI | Beef cattle, sheep and deer.          | US\$ 7.92 (3.75–15.48) million                                                                                                                                                                              |
| Ari et al.[28]        | 2016-2018 | Brucella, Anthrax, Tularemia, CCHF, Rabies, Cystic Echinococcosis, Toxoplasmosis | Turkey      | <p><b>Total: 1782</b></p> <p><b>Brucella: 1068</b></p> <p><b>Anthrax: 50</b></p> <p><b>Tularemia: 1</b></p> <p><b>CCHF: 505</b></p> <p><b>Rabies: 113</b></p> <p><b>Cystic Echinococcosis: 24</b></p> <p><b>Toxoplasmosis: 21</b></p> | ----   | Livestock (large and small ruminants) | <p><b>Total loss in 2016: US\$ 213,674,967</b></p> <p><b>Total loss in 2017: US\$ 263,105,316</b></p> <p><b>Total loss in 2018: US\$ 336,313,908</b></p> <p><b>Mean of total loss: US\$ 271,031,397</b></p> |

- 141 Asia 2: Cambodia, Myanmar, Laos, Vietnam, and Democratic People's Republic of Korea; Asia 3: Bhutan, Nepal, Bangladesh, Pakistan (Himalayan region); Asia 4: Philippines, Sri Lanka,
- 142 Thailand; SADC: countries in the Southern African Development Community; Eurasia: Afghanistan, Kazakhstan, Kyrgyzstan, Mongolia, the Russian Federation, Turkmenistan, Tajikistan, and
- 143 Uzbekistan. More information in the supporting information pp 6-7.
- 144 CI: Confidence Interval, UI: Uncertainty Interval, CR: Confidence Region, PI: Prediction Interval
- 145 PEP: post-exposure prophylaxis

146

Figure 1: Literature search and article inclusion

147 Publications on zoonoses considering human and animal populations that met the inclusion  
148 criteria started in 2005. Most reported zoonoses were parasitic, whereas no fungal zoonosis was  
149 reported. The most frequently reported zoonoses were rabies, and food-borne diseases such as  
150 cystic echinococcosis, and cysticercosis.

151 The studies considered mainly low- and middle-income countries, except for the Netherlands and  
152 New Zealand. Only two studies on rabies and cystic echinococcosis were on a global scale, and one  
153 study on rabies in two continents: Africa, and Asia (Figure 2). The preferred currency to measure  
154 the economic loss was the U.S dollar for 12 articles, and the euro for studies in Cameroon and the  
155 Netherlands.

156 Figure 2: Zoonoses studied in humans and animals with their year of publication by income countries

157

158 All studies performed their assessment of the monetary impact of the disease. In humans, it  
159 comprises the costs associated with direct treatment of the medical condition and indirect costs  
160 associated with for e.g., transportation. In animals, it was costs associated with lost productivity,  
161 organ condemnation, or death.

162 Ten articles used stochastic methods for their estimations, expressing their uncertainty in a 95%  
163 Confidence Interval (CI), Uncertainty Interval (UI), Confidence Region (CR), Prediction Interval (PI),  
164 and one with a 90% CI (Table 2).

165 Table 2: Estimates of the dual burden of zoonoses.

| Zoonotic disease/<br>pathogen                                             | Year                                                              | Country/<br>Region | DALY                                                                                                                                                                                                                       | ALE                                                                                                                                    | zDALY                                                                                                                                                                                                                  | Uncertainty and<br>distribution           |
|---------------------------------------------------------------------------|-------------------------------------------------------------------|--------------------|----------------------------------------------------------------------------------------------------------------------------------------------------------------------------------------------------------------------------|----------------------------------------------------------------------------------------------------------------------------------------|------------------------------------------------------------------------------------------------------------------------------------------------------------------------------------------------------------------------|-------------------------------------------|
| <b>Rabies</b><br><i>(Lyssavirus)</i>                                      | Human<br>data: 1996-<br>2000, 2003<br><br>Livestock<br>cost: 2002 | Africa and Asia    | <b>Africa:</b> 835,380 (281,198–<br>1,387,050)<br><br><b>Asia:</b> 1141077 (3844311– 1898325)<br><br><b>Total:</b> 1,882,387 (907,507–<br>2,874,205)<br><br><b>Total without PEP:</b> 10,068,537<br>(5,373,433–14,747,882) | <b>Africa:</b> 1858 (1661–2055)<br><br><b>Asia:</b> 4157 (3733 –4580)<br><br><b>Total:</b> 7334 (6612–8055)                            | <b>Africa:</b> 837,158 (283,087–1,388,963)<br><br><b>Asia:</b> 1,145,287 (388,592– 1,902,310)<br><br><b>Total:</b> 1,889,928 (914,795–2,881,607)<br><br><b>Total without PEP:</b> 10,075,831<br>(5,380,459–14,755,386) | 90 % CI Uniform<br><br>distribution       |
| <b>Cystic</b><br><b>echinococcosis</b> ( <i>E.</i><br><i>granulosus</i> ) | 1996-2003                                                         | Worldwide          | <b>Unadjusted:</b><br>292,111 (222,377–362,385)<br><br><b>Adjusted for underreporting:</b><br>1,019,530 (869,875–1,167,877)                                                                                                | <b>Unadjusted:</b> 2,782,397<br>(2,084,548–3,489,591)<br><br><b>Adjusted for underreporting:</b><br>4,916,173(3,495,999–<br>6,341,741) | <b>Unadjusted:</b><br>3,075,118 (2,371,693–3,788,135)<br><br><b>Adjusted for underreporting:</b><br>5,935,463 (4,497,316–7,377,636)                                                                                    | 95% CI<br><br>Uniform<br><br>distribution |

|                                                                                                                                          |           |                               |                        |                                                                                                                                                                                                                      |                                                                                                                                                                                                                             |                                    |
|------------------------------------------------------------------------------------------------------------------------------------------|-----------|-------------------------------|------------------------|----------------------------------------------------------------------------------------------------------------------------------------------------------------------------------------------------------------------|-----------------------------------------------------------------------------------------------------------------------------------------------------------------------------------------------------------------------------|------------------------------------|
| <b>Echinococcosis:</b><br><br><b>alveolar echinococcosis (<i>E. multilocularis</i>) and cystic echinococcosis (<i>E. granulosus</i>)</b> | 2001-2003 | China (Shiqu County)          | 1100                   | <b>Total losses</b> (excluding losses in calf production, carcass weight, and yak hide): 247 (214–279)<br><br><b>Total losses</b> (including losses in calf production, carcass weight, and yak hide): 389 (342–438) | <b>Total losses</b> (excluding losses in calf production, carcass weight, and yak hide): 1347 (1314–1379)<br><br><b>Total losses</b> (including losses in calf production, carcass weight, and yak hide): 1490 (1442– 1537) | 95% CI<br><br>Uniform distribution |
| <b>Cysticercosis (<i>Taenia solium</i>)</b>                                                                                              | 2007      | Mozambique (Angónia district) | 2027 (1428–2761)       | Without the proportion of pigs sold: 141 (81–230)<br><br><b>Total:</b> 47 (27–76)                                                                                                                                    | Without the proportion of pigs sold: 2173 (1569–2909)<br><br><b>Total:</b> 2075 (1476–2809)                                                                                                                                 | 95 % UI<br><br>Gamma distribution  |
| <b>Cysticercosis (<i>Taenia solium</i>)</b>                                                                                              | 2008      | Cameroon                      | 58987 (16,329–101,231) | 568 (439–697)                                                                                                                                                                                                        | 59,540 (16,896–101,803)                                                                                                                                                                                                     | 95% CR<br><br>Uniform distribution |
| <b>Cystic echinococcosis (<i>E. granulosus</i>)</b>                                                                                      | 2010      | Peru                          | 1139                   | 1099 (792–1407)                                                                                                                                                                                                      | 2238 (1931–2546)                                                                                                                                                                                                            | 95% CI Uniform distribution        |

|                                |      |           |                                                     |                                 |                                                     |                                            |
|--------------------------------|------|-----------|-----------------------------------------------------|---------------------------------|-----------------------------------------------------|--------------------------------------------|
| <b>Rabies<br/>(Lyssavirus)</b> | 2010 | Worldwide | <b>Asia 2:</b> 368,376 (94,862–640,037)             | <b>Asia 2:</b> 420 (44–1611)    | <b>Asia 2:</b> 367,849 (94,900–641,049)             | 95% CI Uniform<br>distribution,<br>Poisson |
|                                |      |           | <b>Asia 3:</b> 462097 (94,090–833,514)              | <b>Asia 3:</b> 87 (0.6–453)     | <b>Asia 3:</b> 464,757 (94,279–833,473)             |                                            |
|                                |      |           | <b>Asia 4:</b> 46619 (11,803–81,145)                | <b>Asia 4:</b> 34 (6–207)       | <b>Asia 4:</b> 46485 (11,854–81,205)                |                                            |
|                                |      |           | <b>China:</b> 365023 (74,959–658,747)               | <b>China:</b> 1448 (405–2477)   | <b>China:</b> 368536 (76,900–660,044)               |                                            |
|                                |      |           | <b>India:</b> 1,909,088 (453,985–<br>3,358,527)     | <b>India:</b> 4580 (1439–7724)  | <b>India:</b> 1907787 (457,488–3,364,968)           |                                            |
|                                |      |           | <b>Indonesia:</b> 105605 (16575–193418)             | <b>Indonesia:</b> 22 (0–506)    | <b>Indonesia:</b> 105,310 (16,715–193,698)          |                                            |
|                                |      |           | <b>North Africa:</b> 251,128 (48,721–<br>455,977)   | <b>North Africa:</b> 8 (0.5–73) | <b>North Africa:</b> 253,229 (48,634–<br>456,088)   |                                            |
|                                |      |           | <b>Congo Basin:</b> 636,550 (263,527–<br>1,011,627) | <b>Congo Basin:</b> 3 (0.3–36)  | <b>Congo Basin:</b> 638,791 (263,413–<br>1,011,283) |                                            |
|                                |      |           | <b>West Africa:</b> 587,499 (224,634–<br>952,020)   | <b>West Africa:</b> 11 (0–186)  | <b>West Africa:</b> 587,641 (225,199–<br>952,027)   |                                            |
|                                |      |           |                                                     | <b>SADC:</b> 5 (0–57)           | <b>SADC:</b> 934,682 (196,022–1,674,590)            |                                            |



|  |  |  |                                                                                                                                                                                                                                                                                                                                                                                                                                                                       |                                                                                                                                                                                                                                                                                                                              |                                                                                                                                                                                                                                                                                                                                                                                                                       |  |
|--|--|--|-----------------------------------------------------------------------------------------------------------------------------------------------------------------------------------------------------------------------------------------------------------------------------------------------------------------------------------------------------------------------------------------------------------------------------------------------------------------------|------------------------------------------------------------------------------------------------------------------------------------------------------------------------------------------------------------------------------------------------------------------------------------------------------------------------------|-----------------------------------------------------------------------------------------------------------------------------------------------------------------------------------------------------------------------------------------------------------------------------------------------------------------------------------------------------------------------------------------------------------------------|--|
|  |  |  | <p><b>SADC:</b> 939,689 (197,503–1,673,558)</p> <p><b>Andean:</b> 1994 (101–3898)</p> <p><b>Brazil:</b> 998 (50–1949)</p> <p><b>Caribbean:</b> 10459 (4308–16,672)</p> <p><b>Central America:</b> 1493 (75–2925)</p> <p><b>Southern Cone:</b> 503 (24–976)</p> <p><b>Eastern Europe:</b> 2497 (128–4875)</p> <p><b>Eurasia:</b><br/>206583 (54,047–359,951)</p> <p><b>Middle East:</b> 22,594 (6822–38,167)</p> <p><b>Total:</b> 5,916,890 (1,544,600–10,282,026)</p> | <p><b>Andean:</b> 2 (0.2–11)</p> <p><b>Brazil:</b> 3 (2–5)</p> <p><b>Caribbean:</b> 0 (0–2)</p> <p><b>Central:</b> 0.03 (0–5)</p> <p><b>Southern Cone:</b> 0 (0–4)</p> <p><b>Eastern Europe:</b> 0.12 (0–2)</p> <p><b>Eurasia:</b> 5 (1–62)</p> <p><b>Middle East:</b> 0.15 (0.02–3)</p> <p><b>Total:</b> 279 (101– 466)</p> | <p><b>Andean:</b> 2009 (104–3905)</p> <p><b>Brazil:</b> 1006 (52–1952)</p> <p><b>Caribbean:</b> 10,467 (4324–16,675)</p> <p><b>Central America:</b> 1491 (74–2925)</p> <p><b>Southern Cone:</b> 500 (26–975)</p> <p><b>Eastern Europe:</b> 2509 (126 –4874)</p> <p><b>Eurasia:</b> 206,690 (54,015–360,086)</p> <p><b>Middle East:</b> 22,532 (6848–38,182)</p> <p><b>Total:</b> 5,920,014 (1,547,860–10,290,815)</p> |  |
|--|--|--|-----------------------------------------------------------------------------------------------------------------------------------------------------------------------------------------------------------------------------------------------------------------------------------------------------------------------------------------------------------------------------------------------------------------------------------------------------------------------|------------------------------------------------------------------------------------------------------------------------------------------------------------------------------------------------------------------------------------------------------------------------------------------------------------------------------|-----------------------------------------------------------------------------------------------------------------------------------------------------------------------------------------------------------------------------------------------------------------------------------------------------------------------------------------------------------------------------------------------------------------------|--|

|                                                |                                          |             |                                                                                                   |                                                                                                                                                                        |                                                                                                                                                                                                                |                                                    |
|------------------------------------------------|------------------------------------------|-------------|---------------------------------------------------------------------------------------------------|------------------------------------------------------------------------------------------------------------------------------------------------------------------------|----------------------------------------------------------------------------------------------------------------------------------------------------------------------------------------------------------------|----------------------------------------------------|
| <b>Q fever</b><br><i>(Coxiella burnetti)</i>   | 2007-2011                                | Netherlands | 2833 (1071–4603)                                                                                  | 2.86 (1.07–4.6)                                                                                                                                                        | 2843 (1071–4603)                                                                                                                                                                                               | 95% CI Uniform distribution                        |
| <b>Cysticercosis</b><br><i>(Taenia solium)</i> | 2012                                     | Tanzania    | 30,443 (9264–72,115)                                                                              | 3985 (1485–6491)                                                                                                                                                       | 34,455 (12,993–76,193)                                                                                                                                                                                         | 95% UI Gamma distribution;<br>Uniform distribution |
| <b>Rabies</b><br><i>(Lyssavirus)</i>           | 2005-2014                                | Viet Nam    | <b>Age 26:</b> 4956 (3432–6471); <b>Age 31:</b> 4450 (3086–5824); <b>Age 36:</b> 3955 (2744–5176) | 3985 (1485 –6491)                                                                                                                                                      | <b>Age 26:</b> 5815 (4292–7331); <b>Age 31:</b> 5309 (3946–6683); <b>Age 36:</b> 4814 (3603–6035)<br><b>Total:</b> 5316 (4382–6244)                                                                            | 95% CI Uniform distribution                        |
| <b>Rabies</b><br><i>(Lyssavirus)</i>           | 2003-2015<br>Human data: 2007, 2010-2015 | Kazakhstan  | <b>Total:</b> 454 (339–593)<br><b>Without PEP:</b> 7827 (4746–12074)                              | <b>Cattle:</b> 3 (2.8–3.25)<br><b>Sheep:</b> 0.09 (0.07–0.11);<br><b>Camel:</b> 0.016 (0.009 –0.03)<br><b>Horse:</b> 0.3 (0.24 –0.42)<br><b>Total:</b> 3.42 (3.16–3.7) | Cattle: 457 (342 –596)<br>Sheep: 454 (339 –594)<br>Camel: 454 (339–594)<br>Horse: 339 (454–594)<br>Total: 457 (342–597).<br><br><b>Without PEP:</b><br>Cattle: 7830 (4749–12,077)<br>Sheep: 7827 (4746–12,074) | 95% CI Gamma distribution                          |

|                                                         |           |             |                                                                                                                                                                                                   |                  |                                                                                                               |                                               |
|---------------------------------------------------------|-----------|-------------|---------------------------------------------------------------------------------------------------------------------------------------------------------------------------------------------------|------------------|---------------------------------------------------------------------------------------------------------------|-----------------------------------------------|
|                                                         |           |             |                                                                                                                                                                                                   |                  | <p>Camel: 7827 (4746–12,074)</p> <p>Horse: 7827 (4746–12,076)</p> <p>Total: 7831 (4749–12,077)</p>            |                                               |
| <p><b>Brucellosis</b><br/><i>(Brucella spp)</i></p>     | 2006-2015 | Kazakhstan  | 713 (661–766)                                                                                                                                                                                     | 1730 (1729–1731) | 2443 (2391–2496)                                                                                              | <p>95% CI</p> <p>Poisson<br/>distribution</p> |
| <p><b>Leptospirosis</b><br/><i>(Leptospira spp)</i></p> | 2013-2019 | New Zealand | <p><b>At risk of leptospirosis:</b> 14.07 (95%<br/>PI: 1.86–80.73)</p> <p><b>Not at risk of leptospirosis:</b> 3.69<br/>(95% PI: 0.49–21.20)</p> <p><b>Total:</b> 17.76 (95% PI: 2.35–101.93)</p> | 178              | <p><b>At risk of leptospirosis:</b> 192</p> <p><b>Not at risk of leptospirosis:</b> 182</p> <p>Total: 196</p> | ----                                          |

|                                                                                                         |           |        |                                                                                                                         |                                              |                                               |                                |
|---------------------------------------------------------------------------------------------------------|-----------|--------|-------------------------------------------------------------------------------------------------------------------------|----------------------------------------------|-----------------------------------------------|--------------------------------|
| <b>Brucella, Anthrax,<br/>Tularemia, CCHF,<br/>Rabies, Cystic<br/>Echinococcosis,<br/>Toxoplasmosis</b> | 2016-2018 | Turkey | Brucella: 1083 (818–1314)                                                                                               | Brucella large ruminant: 1410<br>(840 –3324) | Brucella large ruminant: 2493 (1659–<br>4637) | 95% CI Poisson<br>distribution |
|                                                                                                         |           |        | Anthrax: 30 (0–135)                                                                                                     | Brucella small ruminant: 265<br>(119–831)    | Brucella small ruminant: 1348 (937–<br>2144)  |                                |
|                                                                                                         |           |        | <b>Total</b> (Brucella, Anthrax, Tularemia,<br>CCHF, Rabies, Cystic Echinococcosis,<br>Toxoplasmosis): 1686 (1463–2207) | Brucella total: 1675 (959-<br>4155)          | Brucella total: 2758 (1778– 5467)             |                                |
|                                                                                                         |           |        |                                                                                                                         | Anthrax large ruminant: 116<br>(97–240)      | Anthrax large ruminant: 127 (116–<br>375)     |                                |
|                                                                                                         |           |        |                                                                                                                         | Anthrax small ruminant: 56<br>(46–111)       | Anthrax small ruminant: 76 (56–246)           |                                |
|                                                                                                         |           |        |                                                                                                                         | Anthrax total: 3176 (1103–<br>7456)          | Anthrax total: 173 (166–486)                  |                                |
|                                                                                                         |           |        |                                                                                                                         | <b>Total: 1851 (1104–4500)</b>               | <b>Total: 3538 (2567–6706)</b>                |                                |

166

167 The sum of values may not be exact since they are based on estimations randomly generated.

168 Most values are rounded to two significant figures

169 Four papers estimated the burden of rabies: Africa and Asia, Vietnam, Kazakhstan, and worldwide.  
170 The countries included in the worldwide study on rabies, Africa and Asia are listed in the  
171 supporting information pp 6-7. Viet Nam reported the DALYs by age (26, 31,36). Whereas  
172 Kazakhstan reported the values on rabies without post-exposure prophylaxis (PEP). The total  
173 zDALYs per capita was higher in Africa (11 zDALYs per 10,000 population) than Asia (3 zDALYs per  
174 10,000 population).

175 Cystic echinococcosis (*E. granulosus*) was reported in Peru, Turkey, and on a global scale. In  
176 addition, a study in Shiqu County, China, studied both cystic echinococcosis, and alveolar  
177 echinococcosis (*E. multilocularis*).

178 For brucellosis, the Kazakh study only accounted for losses due to slaughtering of the animals and  
179 subsequent compensation. Whereas the Turkish study also considered reduced productivity.  
180 Besides, the Turkish study was the only one that included bacterial, parasitic, and viral zoonoses.  
181 However, we only determined the ALE for brucellosis and anthrax since the animal loss was only  
182 available for those diseases. We calculated the total zDALY for all the diseases included in this  
183 study.

184 Adding all the adjusted estimates for each study, we obtained a zDALY of 11,015,438 (95% CI:  
185 6,235,971-15,806,100) and an ALE of 4,936,233 (95% CI: 3,512,616-6,357,435). The ALE  
186 represents approximately 45% of the total zDALYs.

187 Since the studies that already estimated zDALYs did not meet the inclusion criteria, we added  
188 their findings in the supporting information p 4.

189 **Bias assessment – ROBIS**

190 The full ROBIS assessment is provided in the supporting information pp 8-12. Overall, the risk of  
191 bias for this study is low. According to the signaling questions, there were no concerns regarding  
192 all the domains (study eligibility criteria, identification, selection of studies, and data collection).  
193 Therefore, the review is likely to include a high proportion of relevant studies.  
194 However, the last domain (synthesis and findings) outlines that no meta-analysis was performed.  
195 We report the reasons in the discussion.  
196 The PRISMA checklist is provided in the supporting information pp 13-15.

## 197 **Discussion**

198 We report the first systematic review that estimates the dual burden of zoonoses in humans and  
199 domestic animals based on studies available worldwide. Such information is needed for zoonosis  
200 prioritization, and resource allocation since interventions to control zoonoses are frequently  
201 carried out in animal hosts. Zoonoses impact health and socio-economic factors in multiple ways,  
202 increasing inequity between populations. Zoonoses in LICs are often under-reported compared to  
203 non-zoonotic diseases [29].

204 Despite the substantial burden caused by zoonoses in humans and animals, the number of studies  
205 combining both burdens is scarce. Besides, the use of old data does not reflect the current  
206 situation that depicts the dual burden of zoonoses. Studies that include human and animal data  
207 for zoonoses are relatively new (published in the last 20 years.) We observed an increased number  
208 of reports on the dual burden of diseases over the years. Up to date, only three studies have  
209 reported zDALYs: on cystic echinococcosis in Morocco[12], 25 zoonoses in Paraguay[10], *Taenia*

210 *solium* in Lao PDR.[11] We excluded them from our synthesis since they already contain zDALY  
211 values.

212 The dual burden of zoonoses was reported the most in Asia and Africa. The majority of zoonoses  
213 were based on estimations, due to the lack of reports, access to health care, and tools for disease  
214 diagnoses. The data source of the global estimates on rabies (Hampson et al.)[30] and the one  
215 reported in Asia and Africa (Knobel et al.)[16] have seven years difference. Both studies applied  
216 different ranges of uncertainty to their estimates and used different clusters. Therefore,  
217 comparing the zDALYs from Asia and Africa in both studies is slightly difficult. We report higher  
218 zDALYs for estimates from Hampson's study. If post-exposure prophylaxis is not considered, the  
219 burden increased by 5 times, because rabies is lethal, and hence the high DALYs contribute to  
220 higher zDALYs. Comparing the global rabies estimates provided by the Global Burden of Diseases  
221 (GBD)[31], and Hampson et al., the median of the latter was 2,665,145 DALYs more than the GBD's  
222 in 2010 (the year of the data source of Hampson et al. study.) However, the GBD estimated  
223 2,529,389,250 DALYs more than Hampson's estimation for rabies in 2015 (year of publication of  
224 Hampson's study.)

225 Among diseases included in this review, echinococcosis was the most reported parasitic zoonosis.  
226 Cystic echinococcosis being the most common form reported. Echinococcosis causes a  
227 considerable burden because its treatment is expensive and complicated [32]. Alveolar  
228 echinococcosis (*E. multilocularis*) is considered rare worldwide, except for China, Russia, and the  
229 Kyrgyz Republic.[33,34] Alveolar echinococcosis (AE) rarely affects agricultural animals or pets  
230 (except for exceedingly rare cases of AE in dogs when they act as an intermediate host), so the  
231 health burden on animals is negligible. Dogs are common definitive hosts but do not show any

232 clinical symptoms. Cystic echinococcosis on a global scale was the only disease that had higher ALE  
233 compared to the DALY. Therefore, the animal burden had more influence on the total zDALYs of  
234 cystic echinococcosis worldwide. For the global estimation of cystic echinococcosis, *Budke et al*  
235 presented it as adjusted and unadjusted DALYs. They were higher than GBD's without exceptions  
236 (including period of data source and publication). The least difference was between the  
237 unadjusted values and GBD, mainly in 1996. For that year, the difference was 106,017 (with  
238 unadjusted values) and 833,436 (adjusted values). The unadjusted DALYs were similar to but  
239 higher than 285,000 DALY estimates for CE by the Foodborne Disease Burden Epidemiology  
240 Reference Group (FERG) – 184,000 DALYs [35]. This difference may be due to the lower disability  
241 weight (DW) used by FERG and GBD (abdominal discomfort) compared to Budke et al. (liver  
242 cancer). However, no specific DW has yet been developed for CE, so appropriate ones from  
243 diseases with similar morbidity have been used.

244 Cysticercosis was studied in three African countries. The highest zDALY on cysticercosis was  
245 calculated for Cameroon with data from 2008, followed by Tanzania (2012). However, Tanzania  
246 reported a higher ALE compared to Cameroon due to higher economic losses in the pig population.  
247 Mozambique data was only from the Agonia district; thus, the results are not comparable to the  
248 other countries. Although approximately only 0,9% of total zDALYs account for ALE in Cameroon,  
249 2% in Mozambique, and 11% in Tanzania, respectively. When considering the zDALY per capita,  
250 Cameroon has the highest zDALY per capita (12 zDALYs per 1000 population), followed by  
251 Mozambique (6 zDALYs per 1000 population), and Tanzania (1 zDALY per 1000 population).  
252 Cameroon's cysticercosis estimated by Praet et al was higher than the GBD's. For cysticercosis in  
253 Tanzania, Trevisan's estimation was also higher than GBD's, being the least difference in 2017 (the



254 year of publication), around 24,166 DALYs. We assume the DALY on *T. solium* is higher than ALE,  
255 because it causes epilepsy in humans with high morbidity and mortality. Whereas the ALE on  
256 cysticercosis results only in organ condemnation. Furthermore, the lack of data on animals also  
257 contributes to a lower ALE. In Tanzania and Mozambique, these pigs lose half of their value, while  
258 in Cameroon the price usually is reduced by 30%. This demonstrates that cultural practices are  
259 relevant when estimating the impact or burden of a given condition on an animal population. It  
260 also shows, that the zDALY metric is able to represent such differences effectively.

261 Generally, the impact of zoonoses is usually associated with low- and middle-income countries.  
262 However, the studies in New Zealand and the Netherlands demonstrate that also high-income  
263 countries can suffer from losses in health, time, and money caused by zoonoses. Even though their  
264 impact is less than those in LICs and LMICs, they can worsen if appropriate preventive measures  
265 are not taken. For example, in the case of Q fever in the Netherlands, it was estimated that the  
266 loss of a culling milk goat is 100 times higher than a dose of the vaccine [22]. We estimated that  
267 in Netherlands Q-fever burden results to 2843 zDALYs, and only 2.86 is attributable to ALE. This  
268 could be because most of the infections due to *Coxiella burnetii* in animals are subclinical, and  
269 only result in abortions during late term. Furthermore, the control of Q-Fever is not included in  
270 these costs, however, authors mentioned that Q-fever control from the cost-utility perspective is  
271 expensive [22].

272 According to our findings, the burden of zoonoses impacts slightly more the human health sector,  
273 which is reflected in high DALYs rather than ALE, except for the estimations of the global cystic  
274 echinococcosis, leptospirosis in New Zealand, brucellosis in Kazakhstan, and zoonoses in Turkey  
275 (Figure 3). The total summed up estimates for our review resulted in 11,015,438 (95% CI:

276 6,235,971-15,806,100), with ALE representing almost half of the total zDALYs. However, it might  
277 be double counted for diseases such as rabies, and echinococcosis because estimates include both  
278 values for global burden and country specific burden.

279  Figure 3: Relative distribution of the DALYs and ALE among the studies

280 Excluded at the full-text screening stage (reasoning available in the supporting information),  
281 estimates provided by Roth et al.,[36] when converted to animal health benefits saved, result in  
282 the same ballpark ratio of DALY to ALE as our estimations for Kazakhstan and Turkey. Other studies  
283 (excluded from this review) with higher ALE than DALY were the 25 combined human and animal  
284 zoonoses in Paraguay [10] (zDALY), and cystic echinococcosis in Morocco [12]. They  
285 demonstrated how the priorities of countries on zoonoses can change if animal populations are  
286 taken into consideration. When countries have higher DALYs compared to ALE, the first question  
287 one must ask is whether this is due to a lack of data from the animal population or if it is because  
288 only losses to farmers due to animal zoonosis account for the ALE.

289 Our estimations are based on the results of previous studies which is a limitation of this study,  
290 besides the small number of papers. In some cases, the data available for humans and animals  
291 were not from the same period, reducing the accuracy of the estimations. Only three studies  
292 shared their code for the analysis (one of them partially), making the rest of the studies not  
293 reproducible. Also, the lack of availability of datasets following the FAIR principles did not allow us  
294 to obtain the confidence intervals of our choice. This shows the need for FAIR data application in  
295 the health area [37–39]. The lack of data continues to be a challenge, as the approach that is used  
296 to analyze it. We did not perform a meta-analysis due to the high variability among studies,

297 including the type of study, and analysis design. This is also evidence of a lack of standardized  
298 methods to unify the burden caused by zoonoses in humans and animals in the past, and the  
299 unfamiliarity of the existing metrics available for that aim.

300 The strength of this study consists of an extensive literature search in different databases without  
301 an initial time restriction. Considering that the GBD study does not include most of the zoonoses  
302 burden, as well as the animal burden of zoonosis, we integrated this data into the human burden  
303 among the studies available worldwide. The DALY is a metric used to prioritize international  
304 disease-control investments. However, its use has been debated for various, primarily ethical,  
305 reasons. Among which is a limited applicability to neglected tropical diseases (NTDs). Most NTDs  
306 in this study have a low chronic morbidity that accounts only for a small portion of DALY. In low-  
307 income settings, where poverty is dominant, this low morbidity raises little attention. Half of the  
308 world's hungry are subsistence farmers and rely heavily on agriculture for their livelihoods.[40]  
309 However, subsistence farming and hard physical work are common in those settings and the  
310 disabling effects of the NTDs are a main source of poverty. This circular causality cannot be  
311 captured through DALY calculations. The zDALY, at least, allows to include the burden from animal  
312 health losses, which are highly relevant in most poverty settings. How much subsistence farmers  
313 lose due to a zoonotic disease and how long it will take them to recover their losses should receive  
314 more attention in public health policy as it addresses an important determinant of human health.

315 Regarding vector-borne zoonoses, the only reported were tularemia and Crimean-Congo  
316 hemorrhagic fever (CCHF) in Turkey but without a direct association of their animal losses. We  
317 suggest establishing databases that incorporate human and animal diseases for each country, thus

318 on a global scale. For example, complement the GBD database with ALEs to move towards better  
319 integration of human and animal health policies.

320 A remaining challenge for the zDALY are animals without traded economic value. Therefore, other  
321 methods for estimating the ALE component of the zDALY (e.g., willingness to pay, pairwise  
322 comparisons or direct time trade off) in analogy to ecosystem services should be explored. Not  
323 only are more comprehensive metrics needed, but also a more integrative effort and support to  
324 face zoonosis in LICs and LMIC. For this endeavor, we consider the zDALY represents a step  
325 towards progress in zoonosis prioritization.

## 326 **Acknowledgments**

327 This study was partially supported by “Don Carlos Antonio Lopez” (BECAL) 7th/2019, and Section  
328 of Veterinary Epidemiology at the University of Zurich.

329 We thank Sabine Klein, the medical librarian, for assisting in the scientific publications search.

## 330 **References**

- 331 1. Taylor LH, Latham SM, Woolhouse MEJ. Risk factors for human disease emergence. *Philos Trans R Soc B*  
332 *Biol Sci.* 2001;356: 983–989. doi:10.1098/rstb.2001.0888
- 333 2. Mathews F. Chapter 8 Zoonoses in Wildlife: Integrating Ecology into Management. *Adv Parasitol.* 2009;68:  
334 185–209. doi:10.1016/S0065-308X(08)00608-8
- 335 3. The FAO-OIE-WHO Collaboration Sharing responsibilities and coordinating global activities to address  
336 health risks at the animal-human-ecosystems interfaces. 2010 [cited 30 Apr 2022]. Available:  
337 <https://www.oie.int/app/uploads/2021/03/final-concept-note-hanoi.pdf>

- 338 4. George J, Häsler B, Mremi I, Sindato C, Mboera L, Rweyemamu M, et al. A systematic review on integration  
339 mechanisms in human and animal health surveillance systems with a view to addressing global health  
340 security threats. *One Heal Outlook* 2020 21. 2020;2: 1–15. doi:10.1186/S42522-020-00017-4
- 341 5. Bernstein AS, Ando AW, Loch-Temzelides T, Vale MM, Li B V., Li H, et al. The costs and benefits of primary  
342 prevention of zoonotic pandemics. *Sci Adv.* 2022;8: 4183.  
343 doi:10.1126/SCIADV.ABL4183/SUPPL\_FILE/SCIADV.ABL4183\_SM.PDF
- 344 6. Häsler B, Gilbert W, Jones A, Pfeiffer DU, Rushton J, Otte MJ, et al. The Economic Value of One Health in  
345 Relation to the Mitigation of Zoonotic Disease Risks. *Curr Top Microbiol Immunol.* 2012;365: 127–151.  
346 doi:10.1007/82\_2012\_239
- 347 7. Palmer SR. *Oxford textbook of zoonoses : biology, clinical practice, and public health control.* 2011; 884.
- 348 8. Disability-adjusted life years (DALYs). [cited 29 Apr 2022]. Available:  
349 <https://www.who.int/data/gho/indicator-metadata-registry/imr-details/158>
- 350 9. Torgerson PR, Ruegg S, Devleeschauwer B, Abela-Ridder B, Havelaar AH, Shaw APM, et al. zDALY: An  
351 adjusted indicator to estimate the burden of zoonotic diseases. *One Heal.* 2018;5: 40–45. Available:  
352 <https://ovidsp.ovid.com/ovidweb.cgi?T=JS&CSC=Y&NEWS=N&PAGE=fulltext&D=pmnm4&AN=29911164>  
353 [https://uzb.swisscovery.slsp.ch/openurl/41SLSP\\_UZB/41SLSP\\_UZB:UZB?sid=OVID:medline&id=pmid:29911164&id=doi:10.1016%2Fj.onehlt.2017.11.003&issn=2352-7714&isbn=&volume=5](https://uzb.swisscovery.slsp.ch/openurl/41SLSP_UZB/41SLSP_UZB:UZB?sid=OVID:medline&id=pmid:29911164&id=doi:10.1016%2Fj.onehlt.2017.11.003&issn=2352-7714&isbn=&volume=5)  
354 164&id=doi:10.1016%2Fj.onehlt.2017.11.003&issn=2352-7714&isbn=&volume=5
- 355 10. Noguera LP, Rüegg S, Torgerson P. The burden of zoonoses in Paraguay: A systematic review. Petersen CA,  
356 editor. *PLoS Negl Trop Dis.* 2021;15: e0009909. doi:10.1371/JOURNAL.PNTD.0009909
- 357 11. Okello WO, Okello AL, Inthavong P, Tiemann T, Phengsivalouk A, Devleeschauwer B, et al. Improved  
358 methods to capture the total societal benefits of zoonotic disease control: Demonstrating the cost-  
359 effectiveness of an integrated control programme for *Taenia solium*, soil transmitted helminths and  
360 classical swine fever in northern Lao PDR. *PLoS Neglected Trop Dis [electronic Resour.* 2018;12: e0006782.  
361 Available:

- 362 <https://ovidsp.ovid.com/ovidweb.cgi?T=JS&CSC=Y&NEWS=N&PAGE=fulltext&D=med15&AN=30231029>
- 363 [https://uzb.swisscovery.slsp.ch/openurl/41SLSP\\_UZB/41SLSP\\_UZB:UZB?sid=OVID:medline&id=pmid:30231029&id=doi:10.1371%2Fjournal.pntd.0006782&issn=1935-2727&isbn=&volume=1](https://uzb.swisscovery.slsp.ch/openurl/41SLSP_UZB/41SLSP_UZB:UZB?sid=OVID:medline&id=pmid:30231029&id=doi:10.1371%2Fjournal.pntd.0006782&issn=1935-2727&isbn=&volume=1)
- 364
- 365 12. Saadiid A, Amarir F, Filali H, Thys S, Rhalem A, Kirschvink N, et al. The socio-economic burden of cystic
- 366 echinococcosis in morocco: A combination of estimation method. *PLoS Negl Trop Dis.* 2020;14: 1–20.
- 367 doi:10.1371/journal.pntd.0008410
- 368 13. Moher D, Liberati A, Tetzlaff J, Altman DG, Altman D, Antes G, et al. Preferred reporting items for
- 369 systematic reviews and meta-analyses: The PRISMA statement. *PLoS Medicine.* Public Library of Science;
- 370 2009. doi:10.1371/journal.pmed.1000097
- 371 14. Historical currency converter with official exchange rates from 1953. [cited 30 Apr 2022]. Available:
- 372 <https://fxtop.com/en/historical-currency-converter.php>
- 373 15. ROBIS tool | Bristol Medical School: Population Health Sciences | University of Bristol. [cited 18 Jan 2022].
- 374 Available: <http://www.bristol.ac.uk/population-health-sciences/projects/robis/robis-tool/>
- 375 16. Knobel DL, Cleaveland S, Coleman PG, Fèvre EM, Meltzer MI, Miranda MEG, et al. Re-evaluating the burden
- 376 of rabies in Africa and Asia. *Bull World Health Organ.* 2005;83: 360–368. Available:
- 377 <https://www.embase.com/search/results?subaction=viewrecord&id=L40704865&from=export>
- 378 17. Budke CM, Deplazes P, Torgerson PR. Global socioeconomic impact of cystic echinococcosis. *Emerg Infect*
- 379 *Dis.* 2006;12: 296–303. Available:
- 380 <https://ovidsp.ovid.com/ovidweb.cgi?T=JS&CSC=Y&NEWS=N&PAGE=fulltext&D=med6&AN=16494758>
- 381 [https://uzb.swisscovery.slsp.ch/openurl/41SLSP\\_UZB/41SLSP\\_UZB:UZB?sid=OVID:medline&id=pmid:16494758&id=doi:10.3201%2Fid1202.050499&issn=1080-6040&isbn=&volume=12&issue](https://uzb.swisscovery.slsp.ch/openurl/41SLSP_UZB/41SLSP_UZB:UZB?sid=OVID:medline&id=pmid:16494758&id=doi:10.3201%2Fid1202.050499&issn=1080-6040&isbn=&volume=12&issue)
- 382
- 383 18. Budke CM, Jiamin Q, Qian W, Torgerson PR. Economic effects of echinococcosis in a disease-endemic
- 384 region of the Tibetan Plateau. *Am J Trop Med Hyg.* 2005;73: 2–10. doi:10.4269/ajtmh.2005.73.2
- 385 19. Trevisan C, Praet N, Pondja A, Assane YA, Dorny P, Magnussen P, et al. Assessment of the social burden of

- 386 Taenia solium Cysticercosis in Angónia District, Mozambique. Trop Med Int Heal. 2013;18: 109–110.  
387 doi:10.1111/tmi.12163
- 388 20. Praet N, Speybroeck N, Manzanedo R, Berkvens D, Nforinwe DN, Zoli A, et al. The disease burden of  
389 Taenia solium cysticercosis in Cameroon. PLoS Negl Trop Dis. 2009;3. doi:10.1371/journal.pntd.0000406
- 390 21. Hampson K, Coudeville L, Lembo T, Sambo M, Kieffer A, Attlan M, et al. Estimating the Global Burden of  
391 Endemic Canine Rabies. Carvalho MS, editor. PLoS Negl Trop Dis. 2015;9: e0003709.  
392 doi:10.1371/journal.pntd.0003709
- 393 22. van Asseldonk MA, Prins J, Bergevoet RH. Economic assessment of Q fever in the Netherlands. Prev Vet  
394 Med. 2013;112: 27–34. Available:  
395 <https://ovidsp.ovid.com/ovidweb.cgi?T=JS&CSC=Y&NEWS=N&PAGE=fulltext&D=med10&AN=23866818>  
396 [https://uzb.swisscovery.sls.ch/openurl/41SLSP\\_UZB/41SLSP\\_UZB:UZB?sid=OVID:medline&id=pmid:23866818&id=doi:10.1016%2Fj.prevetmed.2013.06.002&issn=0167-5877&isbn=&volum](https://uzb.swisscovery.sls.ch/openurl/41SLSP_UZB/41SLSP_UZB:UZB?sid=OVID:medline&id=pmid:23866818&id=doi:10.1016%2Fj.prevetmed.2013.06.002&issn=0167-5877&isbn=&volum)  
397 818&id=doi:10.1016%2Fj.prevetmed.2013.06.002&issn=0167-5877&isbn=&volum
- 398 23. Trevisan C, Devleeschauwer B, Schmidt V, Winkler AS, Harrison W, Johansen M V. The societal cost of  
399 Taenia solium cysticercosis in Tanzania. Acta Trop. 2017;165: 141–154. Available:  
400 <https://ovidsp.ovid.com/ovidweb.cgi?T=JS&CSC=Y&NEWS=N&PAGE=fulltext&D=med14&AN=26756713>  
401 [https://uzb.swisscovery.sls.ch/openurl/41SLSP\\_UZB/41SLSP\\_UZB:UZB?sid=OVID:medline&id=pmid:26756713&id=doi:10.1016%2Fj.actatropica.2015.12.021&issn=0001-706X&isbn=&vol](https://uzb.swisscovery.sls.ch/openurl/41SLSP_UZB/41SLSP_UZB:UZB?sid=OVID:medline&id=pmid:26756713&id=doi:10.1016%2Fj.actatropica.2015.12.021&issn=0001-706X&isbn=&vol)  
402 713&id=doi:10.1016%2Fj.actatropica.2015.12.021&issn=0001-706X&isbn=&vol
- 403 24. Shwiff SA, Brown VR, Dao TT, Elser J, Trung HX, Tien NN, et al. Estimating the economic impact of canine  
404 rabies to Viet Nam 2005-2014. PLoS Neglected Trop Dis [electronic Resour. 2018;12: e0006866. Available:  
405 <https://ovidsp.ovid.com/ovidweb.cgi?T=JS&CSC=Y&NEWS=N&PAGE=fulltext&D=med15&AN=30307947>  
406 [https://uzb.swisscovery.sls.ch/openurl/41SLSP\\_UZB/41SLSP\\_UZB:UZB?sid=OVID:medline&id=pmid:30307947&id=doi:10.1371%2Fjournal.pntd.0006866&issn=1935-2727&isbn=&volume=1](https://uzb.swisscovery.sls.ch/openurl/41SLSP_UZB/41SLSP_UZB:UZB?sid=OVID:medline&id=pmid:30307947&id=doi:10.1371%2Fjournal.pntd.0006866&issn=1935-2727&isbn=&volume=1)  
407 947&id=doi:10.1371%2Fjournal.pntd.0006866&issn=1935-2727&isbn=&volume=1
- 408 25. Sultanov AA, Abdrakhmanov SK, Abdybekova AM, Karatayev BS, Torgerson PR. Rabies in Kazakhstan. PLoS  
409 Neglected Trop Dis [electronic Resour. 2016;10: e0004889. Available:  
410 <https://ovidsp.ovid.com/ovidweb.cgi?T=JS&CSC=Y&NEWS=N&PAGE=fulltext&D=med13&AN=27486744>

- 411 [https://uzb.swisscovery.slsp.ch/openurl/41SLSP\\_UZB/41SLSP\\_UZB:UZB?sid=OVID:medline&id=pmid:27486](https://uzb.swisscovery.slsp.ch/openurl/41SLSP_UZB/41SLSP_UZB:UZB?sid=OVID:medline&id=pmid:27486)  
412 [744&id=doi:10.1371%2Fjournal.pntd.0004889&issn=1935-2727&isbn=&volume=1](https://doi.org/10.1371/journal.pntd.0004889)
- 413 26. Charypkhan D, Sultanov AA, Ivanov NP, Baramova SA, Taitubayev MK, Torgerson PR. Economic and health  
414 burden of brucellosis in Kazakhstan. *Zoonoses Public Heal.* 2019;66: 487–494. Available:  
415 <https://ovidsp.ovid.com/ovidweb.cgi?T=JS&CSC=Y&NEWS=N&PAGE=fulltext&D=med16&AN=31090193>  
416 [https://uzb.swisscovery.slsp.ch/openurl/41SLSP\\_UZB/41SLSP\\_UZB:UZB?sid=OVID:medline&id=pmid:31090](https://uzb.swisscovery.slsp.ch/openurl/41SLSP_UZB/41SLSP_UZB:UZB?sid=OVID:medline&id=pmid:31090)  
417 [193&id=doi:10.1111%2Fzph.12582&issn=1863-1959&isbn=&volume=66&issue=5&s](https://doi.org/10.1111%2Fzph.12582)
- 418 27. Sanhueza JM, Baker MG, Benschop J, Collins-Emerson JM, Wilson PR, Heuer C. Estimation of the burden of  
419 leptospirosis in New Zealand. *Zoonoses Public Heal.* 2020;67: 167–176. Available:  
420 <https://ovidsp.ovid.com/ovidweb.cgi?T=JS&CSC=Y&NEWS=N&PAGE=fulltext&D=med18&AN=31799801>  
421 [https://uzb.swisscovery.slsp.ch/openurl/41SLSP\\_UZB/41SLSP\\_UZB:UZB?sid=OVID:medline&id=pmid:31799](https://uzb.swisscovery.slsp.ch/openurl/41SLSP_UZB/41SLSP_UZB:UZB?sid=OVID:medline&id=pmid:31799)  
422 [801&id=doi:10.1111%2Fzph.12668&issn=1863-1959&isbn=&volume=67&issue=2&s](https://doi.org/10.1111%2Fzph.12668)
- 423 28. ARI HO, İŞLEK E, BİLİR MK, ... The monetary impact of zoonotic diseases on society: The Turkish Case Study.  
424 Ankara .... 2022. Available: <http://vetjournal.ankara.edu.tr/en/pub/auvfd/issue/48904/789598>
- 425 29. Schelling E, Grace D, Willingham AL, Randolph T. Research Approaches for Improved Pro-Poor Control of  
426 Zoonoses. *Food Nutr Bull.* 2007;28: S345–S356. doi:10.1177/15648265070282S214
- 427 30. Hampson K, Coudeville L, Lembo T, Sambo M, Kieffer A, Attlan M, et al. Estimating the Global Burden of  
428 Endemic Canine Rabies. *PLoS Negl Trop Dis.* 2015;9. doi:10.1371/journal.pntd.0003709
- 429 31. GBD Results Tool | GHDx. [cited 28 Jun 2020]. Available: <http://ghdx.healthdata.org/gbd-results-tool>
- 430 32. Echinococcosis. [cited 5 Apr 2022]. Available: [https://www.who.int/news-room/fact-](https://www.who.int/news-room/fact-sheets/detail/echinococcosis)  
431 [sheets/detail/echinococcosis](https://www.who.int/news-room/fact-sheets/detail/echinococcosis)
- 432 33. Torgerson PR, Keller K, Magnotta M, Ragland N. The Global Burden of Alveolar Echinococcosis. *PLoS Negl*  
433 *Trop Dis.* 2010;4: e722. doi:10.1371/JOURNAL.PNTD.0000722
- 434 34. Paternoster G, Boo G, Wang C, Minbaeva G, Usabaliyeva J, Raimkulov KM, et al. Epidemic cystic and alveolar



- 435 echinococcosis in Kyrgyzstan: an analysis of national surveillance data. *Lancet Glob Heal*. 2020;8: e603–  
436 e611. doi:10.1016/S2214-109X(20)30038-3
- 437 35. Torgerson PR, Devleesschauwer B, Praet N, Speybroeck N, Willingham AL, Kasuga F, et al. World Health  
438 Organization Estimates of the Global and Regional Disease Burden of 11 Foodborne Parasitic Diseases,  
439 2010: A Data Synthesis. *PLOS Med*. 2015;12: e1001920. doi:10.1371/JOURNAL.PMED.1001920
- 440 36. Roth F, Zinsstag J, Orkhon D, Chimed-Ochir G, Hutton G, Cosivi O, et al. Human health benefits from  
441 livestock vaccination for brucellosis: case study. *Bull World Health Organ*. 2003;81: 867–876. Available:  
442 <https://ovidsp.ovid.com/ovidweb.cgi?T=JS&CSC=Y&NEWS=N&PAGE=fulltext&D=med5&AN=14997239>  
443 [https://uzb.swisscovery.sls.ch/openurl/41SLSP\\_UZB/41SLSP\\_UZB:UZB?sid=OVID:medline&id=pmid:14997](https://uzb.swisscovery.sls.ch/openurl/41SLSP_UZB/41SLSP_UZB:UZB?sid=OVID:medline&id=pmid:14997239&id=doi:&issn=0042-9686&isbn=&volume=81&issue=12&spage=867&pages=867-)  
444 [239&id=doi:&issn=0042-9686&isbn=&volume=81&issue=12&spage=867&pages=867-](https://uzb.swisscovery.sls.ch/openurl/41SLSP_UZB/41SLSP_UZB:UZB?sid=OVID:medline&id=pmid:14997239&id=doi:&issn=0042-9686&isbn=&volume=81&issue=12&spage=867&pages=867-)
- 445 37. Wilkinson MD, Dumontier M, Aalbersberg IJ, Appleton G, Axton M, Baak A, et al. The FAIR Guiding  
446 Principles for scientific data management and stewardship. *Sci Data* 2016 31. 2016;3: 1–9.  
447 doi:10.1038/sdata.2016.18
- 448 38. FAIR Principles - GO FAIR. [cited 25 Apr 2022]. Available: <https://www.go-fair.org/fair-principles/>
- 449 39. Meyer A, Faverjon C, Hostens M, Stegeman A, Cameron A. Systematic review of the status of veterinary  
450 epidemiological research in two species regarding the FAIR guiding principles. *BMC Vet Res*. 2021;17: 1–14.  
451 doi:10.1186/S12917-021-02971-1/TABLES/4
- 452 40. Final study of the Human Rights Council Advisory Committee on the advancement of the rights of peasants  
453 and other people working in rural areas /. [cited 10 May 2022]. Available:  
454 <https://digitallibrary.un.org/record/720467>

## 455 **Supporting information**

456 **Pages 1-2, Supporting Information 1**, List of used terms for each electronic search

457 **Page 3, Supporting Information 2**, List of papers excluded at the full-text screening, with reasons of  
458 exclusion

459 **Page 4, Supporting Information 3**, Papers with zDALYs estimation excluded from this review

460 **Page 5, Supporting Information 4**, List of included papers

461 **Pages 6-7, Supporting Information 5**, List of countries included in the rabies studies (at global and  
462 continental levels)

463 **Pages 8-11, Supporting Information 6**, ROBIS tool

464 **Page 12-14, Supporting Information 7**, PRISMA checklist

465 **Page 15, Supporting Information 8**, Figures

Pasted Layer

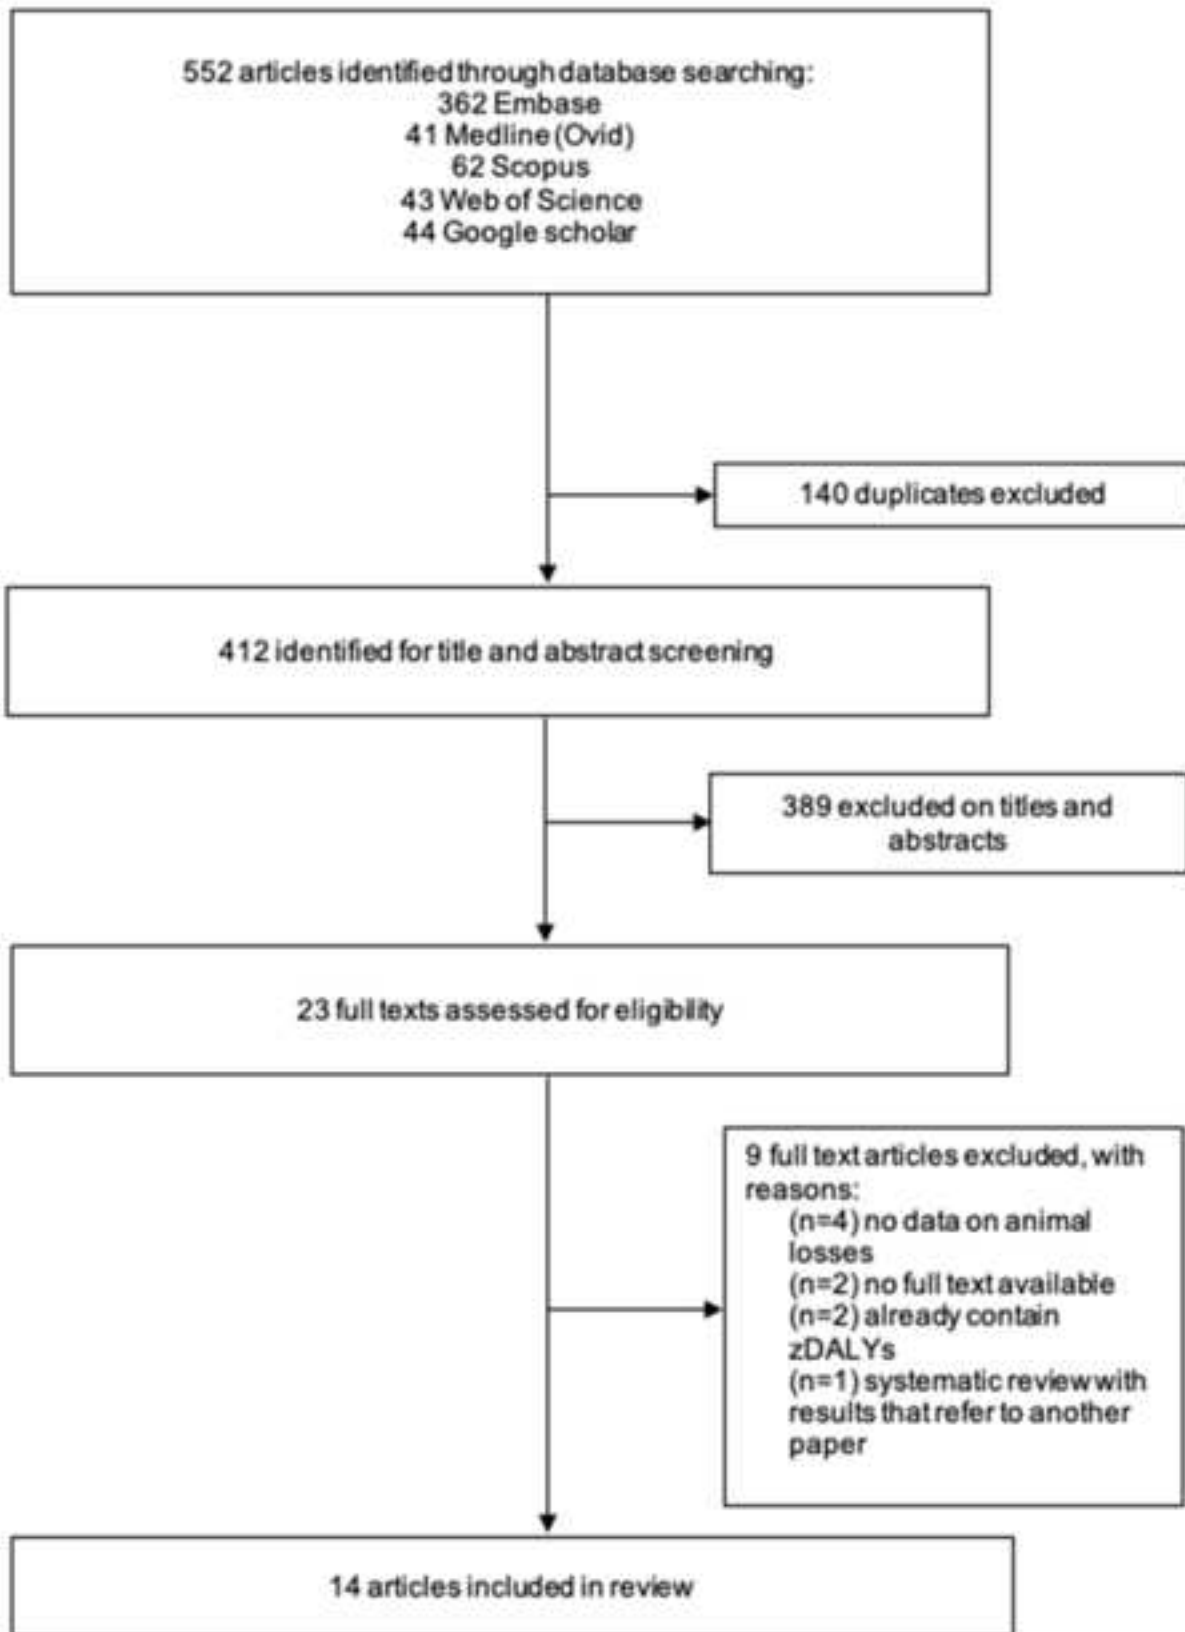

|         | Guernsey | China | Denmark | Finland | France | Germany | Italy | Japan | South Korea | Spain | Sweden | Switzerland |
|---------|----------|-------|---------|---------|--------|---------|-------|-------|-------------|-------|--------|-------------|
| Algeria |          | 2005  |         |         |        |         |       |       |             |       |        |             |
| Andorra |          |       |         |         |        |         |       |       | 2020        |       |        |             |
| Armenia |          |       | 2019    |         |        |         |       |       | 2020        |       |        |             |
| Austria |          |       |         |         |        |         |       |       | 2020        |       |        |             |
| Bahrain | 2009     |       |         | 2018    |        |         |       | 2017  |             |       |        |             |
| Belgium |          | 2005  |         |         |        |         | 2011  |       | 2020        |       |        | 2015        |
| Brazil  |          |       |         |         |        | 2019    |       |       |             |       |        |             |
| Canada  |          |       |         |         | 2013   |         |       |       |             |       |        |             |
| Chile   |          |       | 2016    |         |        |         |       |       | 2020        | 2018  | 2015   | 2015        |
| Czechia |          |       |         |         |        |         |       |       | 2020        |       |        |             |
| Egypt   |          |       |         |         |        |         |       |       | 2020        |       |        |             |

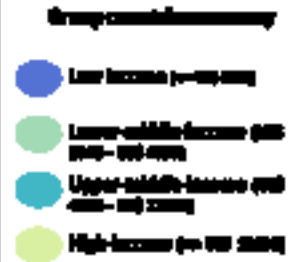

Pasted Layer

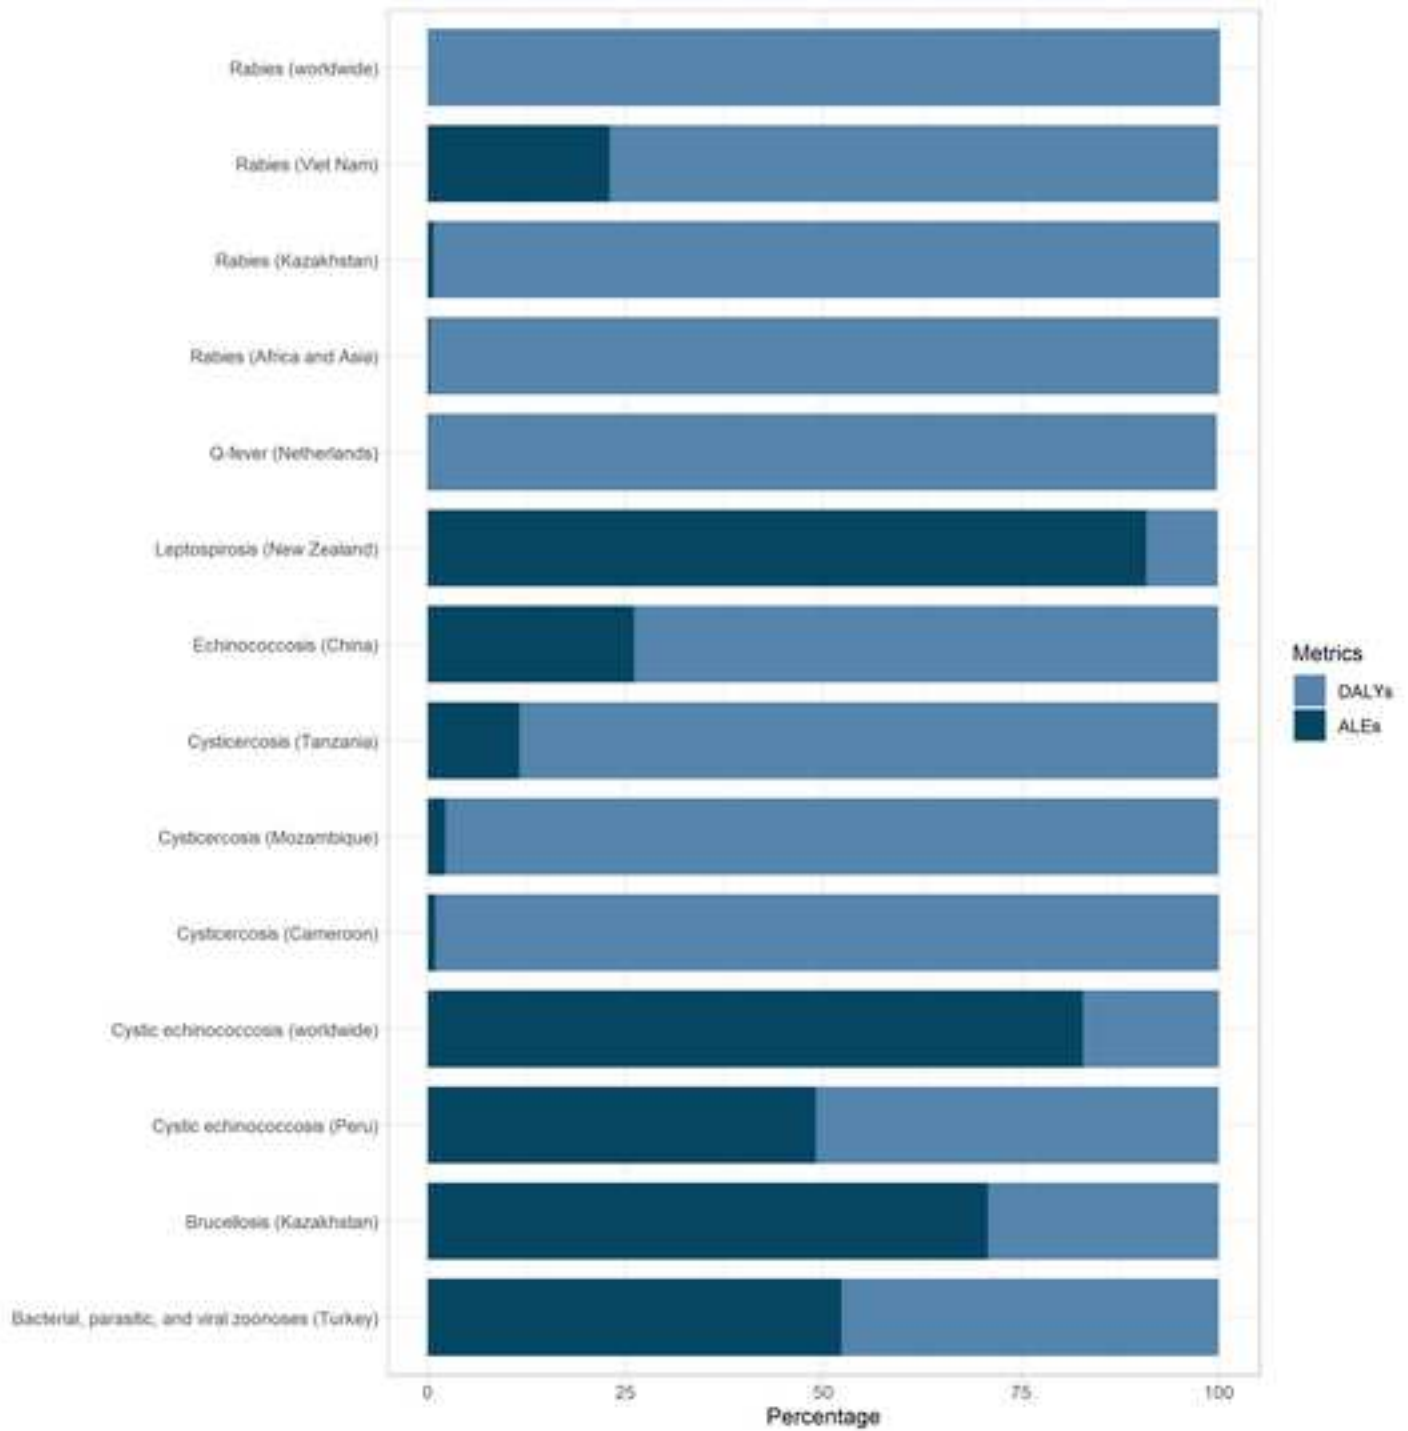

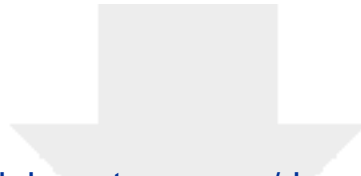

Click here to access/download

**Supporting Information**

Supporting information\_dual burden Plos NTD.docx

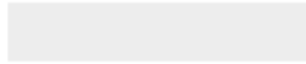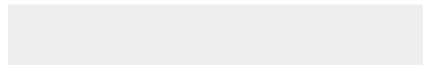

Supplement: pntd.0010540.s012.pdf [file pntd.0010540.s012.pdf]
